# Supplementary material for: Finding candidate locations for aerosol pollution monitoring at street level using a data-driven methodology
Source: Copernicus journal article supplement (doi:10.5194/amt-8-3563-2015), 2015-09-03
Supplement: Supplementary file 1 [file amt-8-3563-2015-supplement.pdf]

Supplement of Atmos. Meas. Tech., 8, 3563–3575, 2015  
<http://www.atmos-meas-tech.net/8/3563/2015/>  
doi:10.5194/amt-8-3563-2015-supplement  
© Author(s) 2015. CC Attribution 3.0 License.

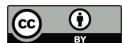

*Supplement of*

## **Finding candidate locations for aerosol pollution monitoring at street level using a data-driven methodology**

**V. Moosavi et al.**

*Correspondence to:* V. Moosavi (svm@arch.ethz.ch)

The copyright of individual parts of the supplement might differ from the CC-BY 3.0 licence.

### 3 **Instrumentation for aerosol measurements**

4 Table S1 shows the characteristics of the instruments used for the aerosol pollution  
5 measurements at the background site above the urban canopy (a balcony in a 28<sup>th</sup>  
6 floor) and transects along the streets of the neighborhood of Rochor investigated in  
7 this study.

8 The DustTrak sensors measure particles size segregated mass-fraction concentrations  
9 with a laser photometer, whose readings depends on the ambient humidity and particle  
10 properties, such as size distribution, morphology and refractive index. We follow the  
11 approach of Ramachandran et al. (2003) to correct the humidity effect using the  
12 relative humidity (RH) data measured by the HOBO loggers. Prior to the study, the  
13 individual response of each individual sensor to the properties of the particles in the  
14 tropical atmosphere of Singapore was evaluated through gravimetric calibrations.  
15 Similar to Apte et al. (2011), power-law regression relationships were obtained from  
16 comparisons with 24-h PM<sub>2.5</sub> concentrations determined by gravimetric analysis of 23  
17 colocated filter samples with concentrations ranging from 10 to 80  $\mu\text{g m}^{-3}$ .

18 Similarly, the micro-aethalometer readings of black carbon (BC) are sensitive to  
19 mechanical shock or vibrations of the instrument. The black carbon data were  
20 corrected using software based on the Optimized Noise-reduction Averaging method  
21 (ONA) available on the manufacturer website ([www.aethlabs.com](http://www.aethlabs.com)). A second  
22 correction was needed to account for the instrument's sensitivity associated with the  
23 filter load. Briefly, because BC concentration is measured by changes in the light  
24 attenuation on a disposable filter through which sample air is drawn at  $100 \text{ cm}^3 \text{ min}^{-1}$ ,  
25 concentrations were adjusted using the empirical relationship of Kirchstetter and  
26 Novakov (2007) based on the instrument-reported attenuation coefficient.

27 The data collected by the Condensation Particle Counter (CPC), Compact Real-Time  
28 Diffusion Charger and Compact Real-Time Photoelectric Aerosol Sensor measuring  
29 particle number concentration, active surface area and concentration of particles-  
30 bound polycyclic aromatic hydrocarbons (pPAHs), respectively, did not require  
31 additional corrections. They only passed through a quality assurance in which  
32 suspicious data were removed using as reference notes taken during the sampling (e.g.

33 if the CPC does not keep a horizontal position, the internal optical sensor may deliver  
 34 erroneous readings).

35 Prior to each day of measurement, all instruments were synchronized to a computer  
 36 clock in the laboratory. This ensured that the time stamp was consistent across all  
 37 instruments. Instruments with removable parts were dismantled and re-assembled for  
 38 each day of sampling. Upon arrival at the background site, zero calibration procedures  
 39 for the CPCs and DustTrak sensors were carried out. Instruments were then set to log  
 40 data for 10 min prior to the actual sampling. All instruments were placed side-by-side  
 41 with inlets close together during these parallel measurement periods. Data from this  
 42 parallel measurement were later used to correct the instruments at the background site  
 43 to those used in the transects at street level. The data post-processing after the  
 44 measurements included a second synchronization. The lag times of each instrument  
 45 were computed through cross-correlations against the DustTrak sensors to achieve  
 46 better synchronization across all instruments. Lag times ranged from 2 to 15 s on  
 47 average. Instruments at the background site were also adjusted to the instruments used  
 48 for the transects.

49  
 50

51 Table S1. Instruments information

| Parameter                                                                                                       | Instrument                                    | Accuracy                                             | Lower threshold                                        | Response time | Model      | Manufacturer              |
|-----------------------------------------------------------------------------------------------------------------|-----------------------------------------------|------------------------------------------------------|--------------------------------------------------------|---------------|------------|---------------------------|
| Particles size segregated mass-fraction concentration (PM <sub>1</sub> , PM <sub>2.5</sub> , PM <sub>10</sub> ) | Hand-held DustTrak DRX Aerosol Monitor        | 1 μg m <sup>-3</sup>                                 | ±0.1% of reading or 1 μg m <sup>-3</sup>               | 1 sec         | TSI 8534   | TSI, MN USA               |
| Particle number concentration (particles < 1 μm)                                                                | Hand-held Condensation Particle Counter (CPC) | ± 20%                                                | 1 particle cm <sup>-3</sup> (min. particle size 10 nm) | 1 sec         | TSI 3007   | TSI, MN USA               |
| Black carbon                                                                                                    | Micro - aethalometer                          | ±0.1 μg m <sup>-3</sup>                              | 1 ng m <sup>-3</sup>                                   | 1 sec         | AE51       | AethLabs, CA USA          |
| Active surface area                                                                                             | Compact Real-Time Diffusion Charger           | ± 15% of reading ± 2 mm <sup>2</sup> m <sup>-3</sup> | 1 mm <sup>2</sup> m <sup>-3</sup>                      | 10 sec        | DC 2000CE  | EcoChem Analytics, TX USA |
| Total pPAHs concentration (particles < 1 μm)                                                                    | Compact Real-Time Photoelectric               | ± 15% of reading ± 3 ng m <sup>-3</sup>              | 1 ng m <sup>-3</sup>                                   | 10 sec.       | PAS 2000CE | EcoChem Analytics, TX USA |

| Parameter                              | Instrument         | Accuracy        | Lower threshold          | Response time | Model   | Manufacturer                 |
|----------------------------------------|--------------------|-----------------|--------------------------|---------------|---------|------------------------------|
| µm)                                    | Aerosol Sensor     |                 |                          |               |         |                              |
| Temperature and relative humidity (RH) | HOBO Pro v2 logger | 0.2°C, ±2.5% RH | 0.02°C at 25°C, 0.03% RH | 1 sec         | U23-001 | Onset Computer Corp., MA USA |

52

### 53 List of Urban Parameters

54 There are three category of urban parameters used in our work.

55 For the first category, land use, the urban parameters are defined by the area occupied  
56 by 17 different types of surface covers and building uses, such as residences, parks,  
57 water bodies, open spaces, roads, commercial establishments, schools, worship  
58 places, etc. therefore, we have the following sub criteria of land use as follows:

- |    |                          |    |                           |
|----|--------------------------|----|---------------------------|
| 59 | 1. Sum-Residential       | 72 | 10. Sum-CIVIC-COMMUNITY-  |
| 60 | 2. Sum-RESIDENTIAL-WITH- | 73 | INSTITUTION               |
| 61 | COMMERCIAL-AT-1ST-       | 74 | 11. Sum-OPEN-SPACE        |
| 62 | STOREY                   | 75 | 12. Sum-PARK              |
| 63 | 3. Sum-COMMERCIAL        | 76 | 13. Sum-BEACH-AREA        |
| 64 | 4. Sum-HOTEL             | 77 | 14. Sum-SPORTS-RECREATION |
| 65 | 5. Sum-WHITE             | 78 | 15. Sum-WATERBODY         |
| 66 | 6. Sum-BUSINESS-1-WHITE  | 79 | 16. Sum-ROAD              |
| 67 | 7. Sum-HEALTH---MEDICAL- | 80 | 17. Sum-TRANSPORT-        |
| 68 | CARE                     | 81 | FACILITIES                |
| 69 | 8. Sum-EDUCATIONAL-      | 82 | 18. Sum-UTILITY           |
| 70 | INSTITUTION              | 83 | 19. Sum-RESERVE-SITE      |
| 71 | 9. Sum-PLACE-OF-WORSHIP  | 84 | 20. Sum-Commercial        |

85 The Space Syntax Method (Hillier et. al., 1976), which is a network analysis method,  
86 uses different analytics to measure parameters in the second category, street network  
87 indicators. *Connectivity* measures the number of immediate neighbors to a segment.  
88 Further, Space Syntax consists of three indicators, namely *Integration*, *Choice* and  
89 *Depth*. Integration calculates the numbers of turns that must be made from a street  
90 segment to reach all other street segments in the network, using shortest paths. If we  
91 consider all the segments from all the segments the radius is selected to be ‘n;’

92 however, if one sets a limit on the possible number of turns, then the most integrated  
 93 segments are those that have the highest number of connections in the limited number  
 94 of. Therefore, it is common to have different integration measures based on different  
 95 radii.

96 The second indicator is called Choice, which is a measure in the category of network  
 97 flow analysis. It measures how a segment is relatively connected to other segments.  
 98 Similar to integration, there are choices of radius to be analyzed around each  
 99 individual node of the street network. Further, it is common to use logarithmic value  
 100 of Choice indicator, which is called Log Choice in our work.

101 Depth measure simply calculates the distance between the centers of each segment to  
 102 all the other segments. Similarly, we can limit the distance to a radius and count the  
 103 number of streets nearby to each segment.

104 In Space Syntax methodology, there are different ways of measuring the shortest path.  
 105 In this work we chose the Angular way, in which the shortest path is the one that  
 106 minimizes the angle between the origin and the destination. Further, for the choice of  
 107 radius there are such options as metric distance, angular or segment and segments  
 108 with length as the weight. Metric distance is the usual distance. Angular radius is  
 109 based on the angle between points. Segment radius is the limit on the number streets  
 110 that one can pass starting from a street segment and weighted segment is when one  
 111 consider the length of streets as well as the number of streets. Based on these  
 112 combinations of indicators with different ways of measuring the radius and shortest  
 113 paths we used the following features in the category of urban network parameters.

|     |                               |     |                               |
|-----|-------------------------------|-----|-------------------------------|
| 114 | 1. Connectivity               | 130 | 14. T1024-Choice-Segment-     |
| 115 | 2. LogChoice800               | 131 | Length-Wgt-R15000-metric      |
| 116 | 3. LogChoice                  | 132 | 15. T1024-Choice-Segment-     |
| 117 | 4. T1024-Choice               | 133 | Length-Wgt-R2000-metric       |
| 118 | 5. T1024-Choice-R10000-metric | 134 | 16. T1024-Choice-Segment-     |
| 119 | 6. T1024-Choice-R1200-metric  | 135 | Length-Wgt-R5000-metric       |
| 120 | 7. T1024-Choice-R15000-metric | 136 | 17. T1024-Choice-Segment-     |
| 121 | 8. T1024-Choice-R2000-metric  | 137 | Length-Wgt-R800-metric        |
| 122 | 9. T1024-Choice-R5000-metric  | 138 | 18. T1024-IntegrationN        |
| 123 | 10. T1024-Choice-R800-metric  | 139 | 19. T1024-Integration-R10000- |
| 124 | 11. T1024-Choice-Segment-     | 140 | metric                        |
| 125 | Length-Wgt                    | 141 | 20. T1024-Integration-R1200-  |
| 126 | 12. T1024-Choice-Segment-     | 142 | metric                        |
| 127 | Length-Wgt-R10000-metric      | 143 | 21. T1024-Integration-R15000- |
| 128 | 13. T1024-Choice-Segment-     | 144 | metric                        |
| 129 | Length-Wgt-R1200-metric       |     |                               |

|     |                                   |     |                                 |
|-----|-----------------------------------|-----|---------------------------------|
| 145 | 22. T1024-Integration-R2000-      | 181 | 41. T1024-Total-Depth-R15000-   |
| 146 | metric                            | 182 | metric                          |
| 147 | 23. T1024-Integration-R5000-      | 183 | 42. T1024-Total-Depth-R2000-    |
| 148 | metric                            | 184 | metric                          |
| 149 | 24. T1024-Integration-R800-metric | 185 | 43. T1024-Total-Depth-R5000-    |
| 150 | 25. T1024-Integration-Segment-    | 186 | metric                          |
| 151 | Length-Wgt                        | 187 | 44. T1024-Total-Depth-R800-     |
| 152 | 26. T1024-Integration-Segment-    | 188 | metric                          |
| 153 | Length-Wgt-R10000-metric          | 189 | 45. T1024-Total-Depth-Segment-  |
| 154 | 27. T1024-Integration-Segment-    | 190 | Length-Wgt                      |
| 155 | Length-Wgt-R1200-metric           | 191 | 46. T1024-Total-Depth-Segment-  |
| 156 | 28. T1024-Integration-Segment-    | 192 | Length-Wgt-R10000-metric        |
| 157 | Length-Wgt-R15000-metric          | 193 | 47. T1024-Total-Depth-Segment-  |
| 158 | 29. T1024-Integration-Segment-    | 194 | Length-Wgt-R1200-metric         |
| 159 | Length-Wgt-R2000-metric           | 195 | 48. T1024-Total-Depth-Segment-  |
| 160 | 30. T1024-Integration-Segment-    | 196 | Length-Wgt-R15000-metric        |
| 161 | Length-Wgt-R5000-metric           | 197 | 49. T1024-Total-Depth-Segment-  |
| 162 | 31. T1024-Integration-Segment-    | 198 | Length-Wgt-R2000-metric         |
| 163 | Length-Wgt-R800-metric            | 199 | 50. T1024-Total-Depth-Segment-  |
| 164 | 32. T1024-Node-Count-R10000-      | 200 | Length-Wgt-R5000-metric         |
| 165 | metric                            | 201 | 51. T1024-Total-Depth-Segment-  |
| 166 | 33. T1024-Node-Count-R1200-       | 202 | Length-Wgt-R800-metric          |
| 167 | metric                            | 203 | 52. T1024-Total-Segment-Length- |
| 168 | 34. T1024-Node-Count-R15000-      | 204 | R10000-metric                   |
| 169 | metric                            | 205 | 53. T1024-Total-Segment-Length- |
| 170 | 35. T1024-Node-Count-R2000-       | 206 | R1200-metric                    |
| 171 | metric                            | 207 | 54. T1024-Total-Segment-Length- |
| 172 | 36. T1024-Node-Count-R5000-       | 208 | R15000-metric                   |
| 173 | metric                            | 209 | 55. T1024-Total-Segment-Length- |
| 174 | 37. T1024-Node-Count-R800-        | 210 | R2000-metric                    |
| 175 | metric                            | 211 | 56. T1024-Total-Segment-Length- |
| 176 | 38. T1024-Total-Depth             | 212 | R5000-metric                    |
| 177 | 39. T1024-Total-Depth-R10000-     | 213 | 57. T1024-Total-Segment-Length- |
| 178 | metric                            | 214 | R800-metric                     |
| 179 | 40. T1024-Total-Depth-R1200-      |     |                                 |
| 180 | metric                            |     |                                 |

215 And finally, for the third category of urban parameters, building topology, the  
216 following parameters were calculated for each grid cell.

- 217 1. Total area covered by buildings
- 218 2. Average buildings' height
- 219 3. The number of corners in the buildings

220

## 221 **References for Supplementary Material**

222 Apte, J. S., Kirchstetter, T. W., Reich, A. H., Deshpande, S. J., Kaushik, G., Chel, A.,  
223 Marshall, J. D. and Nazaroff, W. W.: Concentrations of fine, ultrafine, and black

224 carbon particles in auto-rickshaws in New Delhi, India, *Atmos. Environ.*, 45(26),  
225 4470-4480, 2011.  
226  
227 Hagler, G. S. W., Yelverton, T. L. B., Vedantham, R., Hansen, A. D. A. and Turner, J.  
228 R.: Post-processing method to reduce noise while preserving high time resolution in  
229 aethalometer real-time black carbon data, *Aerosol Air Qual. Res.*, 11, 539-546, 2011.  
230  
231 Kirchstetter, T. W. and Novakov, T.: Controlled generation of black carbon particles  
232 from a diffusion flame and application in evaluating black carbon measurement  
233 methods, *Atmos. Environ.*, 41, 1874–1888, 2007.  
234  
235 Ramachandran, G., Adgate, J. L., Pratt, G. C. and Sexton, K.: Characterizing indoor  
236 and outdoor 15 minute average PM<sub>2.5</sub> concentrations in urban neighbourhoods,  
237 *Aerosol Sci. Tech.*, 37(1), 33-45, 2003.  
238  
239 Hillier, B., Leaman, A., Stansall, P., & Bedford, M. (1976). Space syntax.  
240 *Environment and Planning B: Planning and Design*, 3(2), 147-185.
